# Supplementary material for: Uniconazole Augments Abscisic Acid in Promoting Somatic Embryogenesis in Cotton (Gossypium hirsutum L.)
Source: Front Plant Sci. 2022 Apr 4;13:865778. doi: 10.3389/fpls.2022.865778 (PMC9014122; doi:10.3389/fpls.2022.865778)
Supplement: Supplementary Table 1 — The primers used in this study. [file Table_1.XLSX]

## Sheet: Sheet1
gene	F primer	R primer
Gh_A04G159900	ACAAAGTGATCGCCGCCAAGAT	CCCCAATTCCCGGAGCTTTCC
Gh_A11G237000	GGCACAACCCGGCATAAGT	GGCACAACCCGGCATAAGT
Gh_A09G183800	CGCCGCCGTCATCCTAATG	GCGCCCTCAAACAAATGCTTCT
Gh_D05G129800	AGCTGCTGGTTGTCTGTATGT	GGAACCGCACTGCCCGATAGTA
Gh_D07G231600	CGTTGAAGGCGGGACAGGAATG	AGCCTTCCCTCTCTGAGTATGC
Gh_A10G041400	GGGAAGTCACGGCGGAGATAC	CAATTGCGCCCCGTCGTTCTC
Gh_D13G185500	CCTCCTCTTCTTGCGGTGTTAT	GGCTTTCACATCAAGGGGTCCC
Gh_D13G152700	AGCCCCTCACCGTATTCTTGAA	CCATCGAAAATCCCCTGCTGAT
Gh_D08G170200	CGGATGAACAAGAGGCCATAGT	GCAACCCTAAGTGTCTCCTGAA
Gh_A12G225800	GGCCTCACCGACGAACAAATT	GTATCTTCCCAACTCAGCTCTT
Gh_D12G220400	CAAGAGCTGAGTTGGGAAGATA	CCACTGCTTCTCTGAAGGTAAA
Gh_A08G171800	ACGGATGAACAAGAGGCCATAA	GCAACCCTAAGTGTCTCCTGAA
