# Supplementary material for: Uniconazole Augments Abscisic Acid in Promoting Somatic Embryogenesis in Cotton (Gossypium hirsutum L.)
Source: Front Plant Sci. 2022 Apr 4;13:865778. doi: 10.3389/fpls.2022.865778 (PMC9014122; doi:10.3389/fpls.2022.865778)
Supplement: Supplementary Table 2 — Dataset summary of the sequence alignment results of the sample sequencing data to the selected reference genome. [file Table_2.XLSX]

## Sheet: Sheet1
BMK-ID	Total Reads	Mapped Reads	Uniq Mapped Reads	Multiple Map Reads	Reads Map to '+'	Reads Map to '-'
T01 7d-uni-1	48822244	45,748,693 (93.70%)	43,540,431 (89.18%)	2,208,262 (4.52%)	22,570,252 (46.23%)	22,730,972 (46.56%)
T02 7d-uni-2	47216212	43,955,459 (93.09%)	41,864,464 (88.67%)	2,090,995 (4.43%)	21,712,503 (45.99%)	21,848,335 (46.27%)
T03 7d-uni-3	41746708	39,301,641 (94.14%)	37,527,059 (89.89%)	1,774,582 (4.25%)	19,458,075 (46.61%)	19,548,475 (46.83%)
T04 7d-CK-1	46165490	44,043,023 (95.40%)	41,948,167 (90.86%)	2,094,856 (4.54%)	21,768,439 (47.15%)	21,892,725 (47.42%)
T05 7d-CK-2	39587738	36,997,627 (93.46%)	35,159,894 (88.82%)	1,837,733 (4.64%)	18,270,208 (46.15%)	18,382,283 (46.43%)
T06 7d-CK-2	39628896	37,159,026 (93.77%)	35,459,407 (89.48%)	1,699,619 (4.29%)	18,365,436 (46.34%)	18,468,200 (46.60%)
T07 15d-uni-1	47670222	44,458,651 (93.26%)	42,344,384 (88.83%)	2,114,267 (4.44%)	22,032,741 (46.22%)	22,117,242 (46.40%)
T08 15d-uni-2	54712850	51,395,620 (93.94%)	48,959,556 (89.48%)	2,436,064 (4.45%)	25,431,984 (46.48%)	25,552,978 (46.70%)
T09 15d-uni-3	46198910	43,320,864 (93.77%)	41,086,717 (88.93%)	2,234,147 (4.84%)	21,254,383 (46.01%)	21,475,146 (46.48%)
T10 15d-CK-1	45318270	43,253,102 (95.44%)	41,271,248 (91.07%)	1,981,854 (4.37%)	21,432,866 (47.29%)	21,503,417 (47.45%)
T11 15d-CK-2	44460318	42,336,036 (95.22%)	40,372,652 (90.81%)	1,963,384 (4.42%)	20,951,201 (47.12%)	21,044,515 (47.33%)
T12 15d-CK-3	47819204	45,464,759 (95.08%)	43,254,034 (90.45%)	2,210,725 (4.62%)	22,522,859 (47.10%)	22,609,109 (47.28%)
T13 30d-uni-1	39485818	37,092,124 (93.94%)	35,386,014 (89.62%)	1,706,110 (4.32%)	18,342,423 (46.45%)	18,423,896 (46.66%)
T14 30d-uni-2	41491166	39,349,037 (94.84%)	37,562,640 (90.53%)	1,786,397 (4.31%)	19,474,054 (46.94%)	19,551,425 (47.12%)
T15 30d-uni-3	42731196	39,814,117 (93.17%)	37,964,288 (88.84%)	1,849,829 (4.33%)	19,679,707 (46.05%)	19,772,168 (46.27%)
T16 30d-CK-1	48924942	45,875,193 (93.77%)	43,718,053 (89.36%)	2,157,140 (4.41%)	22,717,934 (46.43%)	22,803,167 (46.61%)
T17 30d-CK-2	42797944	40,981,159 (95.75%)	39,043,242 (91.23%)	1,937,917 (4.53%)	20,317,357 (47.47%)	20,377,787 (47.61%)
T18 30d-CK-3	45915914	44,033,117 (95.90%)	42,016,563 (91.51%)	2,016,554 (4.39%)	21,849,971 (47.59%)	21,895,036 (47.69%)
