# Supplementary material for: Uniconazole Augments Abscisic Acid in Promoting Somatic Embryogenesis in Cotton (Gossypium hirsutum L.)
Source: Front Plant Sci. 2022 Apr 4;13:865778. doi: 10.3389/fpls.2022.865778 (PMC9014122; doi:10.3389/fpls.2022.865778)
Supplement: Supplementary Table 3 — Annotation and the Fragments Per Kilobase of transcript per Million mapped reads (FPKM) values of the differentially expressed genes. [file Table_3.XLSX]

## Sheet: Sheet1
#ID	7 CK	7 Uni	15CK	15Uni	30CK	30Uni	Swiss_Prot_annotation
Gh_A03G094200	3.57582	3.3575	4.5021	11.1911	1.94308	3.10045	Cytochrome P450 71A1 OS=Persea americana OX=3435 GN=CYP71A1 PE=1 SV=2
Gh_A10G197100	0.804929	0.756121	2.36144	1.92065	6.38913	1.92342	Cytochrome P450 83B1 OS=Arabidopsis thaliana OX=3702 GN=CYP83B1 PE=1 SV=1
Gh_D03G024500	0.932643	0.260845	1.61295	1.34045	2.08569	5.66933	Cytochrome P450 83B1 OS=Arabidopsis thaliana OX=3702 GN=CYP83B1 PE=1 SV=1
Gh_A04G159900	0.748902	0.022543	0.827248	1.12955	11.9511	34.6092	L-tryptophan--pyruvate aminotransferase 1 OS=Arabidopsis thaliana OX=3702 GN=TAA1 PE=1 SV=1
Gh_A04G160000	0.0306173	0	0	0.145721	2.95595	12.0151	L-tryptophan--pyruvate aminotransferase 1 OS=Arabidopsis thaliana OX=3702 GN=TAA1 PE=1 SV=1
Gh_D11G062100	0	0	0.574637	0.438599	3.00071	17.9374	Probable indole-3-pyruvate monooxygenase YUCCA10 OS=Arabidopsis thaliana OX=3702 GN=YUC10 PE=2 SV=1

## Sheet: Sheet2
#ID	7 CK	7 Uni	15CK	15Uni	30CK	30Uni	Swiss_Prot_annotation
Gh_A01G072200	16.8188	8.28123	4.99244	3.52899	1.02185	2.92398	Indole-3-acetic acid-amido synthetase GH3.6 OS=Arabidopsis thaliana OX=3702 GN=GH3.6 PE=1 SV=1
Gh_A11G237000	33.6282	24.6731	151.506	120.918	182.817	414.452	Probable indole-3-acetic acid-amido synthetase GH3.1 OS=Arabidopsis thaliana OX=3702 GN=GH3.1 PE=2 SV=1
Gh_D11G214400	61.4988	56.937	176.299	157.061	164.274	478.308	Probable indole-3-acetic acid-amido synthetase GH3.1 OS=Arabidopsis thaliana OX=3702 GN=GH3.1 PE=2 SV=1
Gh_D11G052700	6.26237	3.64144	43.7254	11.0263	12.3529	18.9366	Probable indole-3-acetic acid-amido synthetase GH3.1 OS=Arabidopsis thaliana OX=3702 GN=GH3.1 PE=2 SV=1
Gh_A11G052700	23.8028	17.1758	92.1016	26.7709	32.7479	49.5371	Probable indole-3-acetic acid-amido synthetase GH3.1 OS=Arabidopsis thaliana OX=3702 GN=GH3.1 PE=2 SV=1

## Sheet: Sheet3
#ID	7 CK	7 Uni	15CK	15Uni	30CK	30Uni	Swiss_Prot_annotation
Gh_A06G047000	7.36426	3.98359	0.959744	2.98505	0	0.68933	Auxin transporter-like protein 3 OS=Medicago truncatula OX=3880 GN=LAX3 PE=2 SV=1
Gh_A09G183800	6.29647	4.36304	1.12318	2.66413	0.067633	1.56212	Auxin transporter-like protein 2 OS=Medicago truncatula OX=3880 GN=LAX2 PE=2 SV=1
Gh_D04G147900	8.35071	6.80267	5.39157	4.97375	3.21161	6.97108	Auxin transporter-like protein 2 OS=Medicago truncatula OX=3880 GN=LAX2 PE=2 SV=1
Gh_A09G192500	3.58833	3.12331	0.783346	2.01945	0.201985	1.07523	Auxin efflux carrier component 1 OS=Arabidopsis thaliana OX=3702 GN=PIN1 PE=1 SV=1
Gh_D05G001700	0.053945	0.143923	0.216905	0.0940093	0.3532	7.70456	Auxin efflux carrier component 2 OS=Arabidopsis thaliana OX=3702 GN=PIN2 PE=1 SV=2
Gh_A11G002000	7.60081	4.22074	4.18933	1.41547	0.86348	0.420328	Auxin efflux carrier component 1a OS=Oryza sativa subsp. japonica OX=39947 GN=PIN1A PE=2 SV=1

## Sheet: Sheet4
#ID	7 CK	7 Uni	15CK	15Uni	30CK	30Uni	Swiss_Prot_annotation
Gh_A05G117500	6.00368	4.40679	0.601798	1.6667	1.16626	2.63673	Auxin-responsive protein IAA27 OS=Arabidopsis thaliana OX=3702 GN=IAA27 PE=1 SV=1
Gh_D05G129800	10.0516	6.48513	1.15241	2.44661	0.259552	1.48448	Auxin-responsive protein IAA27 OS=Arabidopsis thaliana OX=3702 GN=IAA27 PE=1 SV=1
Gh_D05G131400	11.5165	9.49557	4.03624	5.30094	0.835551	2.92925	Auxin-responsive protein IAA26 OS=Arabidopsis thaliana OX=3702 GN=IAA26 PE=1 SV=2
Gh_A07G141300	4.68511	5.47215	4.08946	1.95139	5.40877	12.7796	Auxin-responsive protein IAA30 OS=Arabidopsis thaliana OX=3702 GN=IAA30 PE=2 SV=1
Gh_A07G233900	8.87543	7.39836	2.4432	8.20558	2.80414	0.885906	Auxin-induced protein 22D OS=Vigna radiata var. radiata OX=3916 GN=AUX22D PE=2 SV=1
Gh_D07G231600	15.4301	16.206	6.11543	11.0193	5.9729	2.84413	Auxin-induced protein 22D OS=Vigna radiata var. radiata OX=3916 GN=AUX22D PE=2 SV=1
Gh_A09G247300	64.7372	65.8923	31.1116	25.901	36.8129	83.3768	Auxin-induced protein 22D OS=Vigna radiata var. radiata OX=3916 GN=AUX22D PE=2 SV=1
Gh_D09G238300	32.2373	26.7728	14.8114	12.1465	12.1752	31.5777	Auxin-induced protein 22D OS=Vigna radiata var. radiata OX=3916 GN=AUX22D PE=2 SV=1
Gh_A05G114100	47.7363	34.8335	42.8442	17.7728	15.2712	12.2526	Auxin-induced protein AUX22 OS=Glycine max OX=3847 GN=AUX22 PE=2 SV=1
Gh_D05G125900	48.7316	41.5795	38.6197	16.3101	18.5145	14.5972	Auxin-induced protein AUX22 OS=Glycine max OX=3847 GN=AUX22 PE=2 SV=1
Gh_A10G041400	56.0938	60.3551	29.1356	75.9598	23.7438	37.3854	Auxin-responsive protein SAUR41 OS=Arabidopsis thaliana OX=3702 GN=SAUR41 PE=2 SV=1
Gh_D10G053200	32.2101	36.5535	16.1094	45.3641	15.8189	16.5214	Auxin-responsive protein SAUR41 OS=Arabidopsis thaliana OX=3702 GN=SAUR41 PE=2 SV=1
Gh_D12G116800	4.57821	5.38159	8.11743	7.65521	12.8541	6.17111	Auxin-responsive protein SAUR36 OS=Arabidopsis thaliana OX=3702 GN=SAUR36 PE=2 SV=1
Gh_D12G159600	11.5189	14.1851	20.6444	12.7317	21.9231	10.0594	Auxin-responsive protein SAUR32 OS=Arabidopsis thaliana OX=3702 GN=SAUR32 PE=2 SV=1
Gh_A08G040900	7.79442	5.19358	2.95803	3.10247	2.47684	6.30324	Auxin-responsive protein SAUR32 OS=Arabidopsis thaliana OX=3702 GN=SAUR32 PE=2 SV=1
Gh_D02G245800	9.33976	5.48975	1.81187	2.00887	0.936525	3.98008	Auxin-responsive protein SAUR50 OS=Arabidopsis thaliana OX=3702 GN=SAUR50 PE=1 SV=1

## Sheet: Sheet5
#ID	7 CK	7Uni	15 CK	15 Uni	30CK	30Uni	Swiss_Prot_annotation
Gh_D13G185500	18.4543	7.48407	4.86293	4.31466	0.713095	3.31684	WUSCHEL-related homeobox 11 OS=Arabidopsis thaliana OX=3702 GN=WOX11 PE=2 SV=2
Gh_D13G152700	0	0	0	0	1.52352	8.1239	Histone-like transcription factor (CBF/NF-Y) and archaeal histone
Gh_A13G151400	0	0	0	0.0349803	1.15134	6.88004	Histone-like transcription factor (CBF/NF-Y) and archaeal histone
Gh_D05G177600	0	0	0	0.0327373	0.661375	2.19317	Histone-like transcription factor (CBF/NF-Y) and archaeal histone;; Core histone H2A/H2B/H3/H4
Gh_A09G170700	2.43231	1.72534	0.327321	0.868718	0.012051	0.0955003	PREDICTED: zinc finger protein JACKDAW-like [Gossypium hirsutum]
Gh_D02G163000	3.12492	3.18243	0.513684	1.63401	0.828216	3.43077	PREDICTED: multicopper oxidase LPR1-like [Gossypium hirsutum]
Gh_A03G146100	2.74017	1.7462	0.771565	1.60348	0.258772	1.38171	PREDICTED: multicopper oxidase LPR1-like [Gossypium hirsutum]
Gh_D10G050400	11.3043	7.46215	3.67004	4.76148	0.860438	2.95178	PREDICTED: 4-coumarate--CoA ligase 1-like [Gossypium raimondii]
Gh_A10G039500	8.00541	4.74931	2.12423	3.05081	0.181327	1.12315	PREDICTED: 4-coumarate--CoA ligase 1-like [Gossypium arboreum]
Gh_D07G238300	8.62459	4.7024	1.78992	1.80825	1.4496	3.76078	PREDICTED: ABC transporter B family member 19-like isoform X1 [Gossypium hirsutum]

## Sheet: Sheet6
#ID	7CK	7 Uni	15CK	15 Uni	30CK	30 Uni	Swiss_Prot_annotation
Gh_A08G171800	23.6035	29.9559	60.1632	91.4014	90.9999	38.9657	Abscisic acid 8&apos;-hydroxylase 1 OS=Arabidopsis thaliana OX=3702 GN=CYP707A1 PE=2 SV=1
Gh_D08G170200	17.1246	20.1682	35.3692	48.0206	47.1373	22.4702	Abscisic acid 8&apos;-hydroxylase 1 OS=Arabidopsis thaliana OX=3702 GN=CYP707A1 PE=2 SV=1
Gh_A12G225800	4.19234	4.13667	10.4657	36.2391	20.6159	5.83335	Abscisic acid 8&apos;-hydroxylase 1 OS=Arabidopsis thaliana OX=3702 GN=CYP707A1 PE=2 SV=1
Gh_D12G220400	8.26642	8.82753	15.1949	41.591	21.617	9.83764	Abscisic acid 8&apos;-hydroxylase 1 OS=Arabidopsis thaliana OX=3702 GN=CYP707A1 PE=2 SV=1
